# Supplementary material for: CoRSeqV3-C: a novel HIV-1 subtype C specific V3 sequence based coreceptor usage prediction algorithm
Source: PubMed Central journal article supplement (PMC3599735; doi:10.1186/1742-4690-10-24), 2013-02-27
Supplement: 1742-4690-10-24-S1.pdf [file 1742-4690-10-24-S1.pdf]

**CoRSeq<sub>V3-C</sub>: A novel HIV-1 subtype C specific V3 sequence based coreceptor usage prediction algorithm.**

Kieran Cashin, Lachlan R. Gray, Martin R. Jakobsen, Jasminka Sterjovski, Melissa J. Churchill and Paul R. Gorry.

**Supplementary Table 1.**

**Identification of amino acid alterations capable of improving the sensitivity or specificity of a prototype algorithm that predicts C-HIV CXCR4 usage based on the 11/25 rule, the presence of a V3 crown alteration and/or a two amino acid insertion.**

| <b>Algorithm</b>                                                         | <b>Sensitivity (%)</b> | <b>Specificity (%)</b> |
|--------------------------------------------------------------------------|------------------------|------------------------|
| <b>11/25 rule, crown alteration and/or two amino acid insertion only</b> | <b>84.1</b>            | <b>96.83</b>           |
| + Glu10                                                                  | 84.1                   | 97                     |
| + Ile11                                                                  | 85.5                   | 96.83                  |
| + Asn11                                                                  | 85.5                   | 96.83                  |
| + Gap23                                                                  | 84.1                   | 97                     |
| + Thr25                                                                  | 87                     | 96.83                  |
| + Gap25                                                                  | 85.5                   | 94.5                   |
| + Glu32                                                                  | 84.1                   | 97                     |
| + Phe34                                                                  | 85.5                   | 96.83                  |
